# Supplementary material for: BRD4 inhibition impairs DNA mismatch repair, induces mismatch repair mutation signatures and creates therapeutic vulnerability to immune checkpoint blockade in MMR-proficient tumors
Source: PubMed Central journal article supplement — J Immunother Cancer. 2023 Apr 17;11(4):e006070. doi: 10.1136/jitc-2022-006070 (PMC10124306; doi:10.1136/jitc-2022-006070), 2023-04-17
Supplement: jitc-2022-006070supp001.pdf [file jitc-2022-006070supp001.pdf]

## Supporting Information

### **BRD4 inhibition impairs DNA Mismatch Repair, induces mismatch repair mutation signatures and creates therapeutic vulnerability to immune checkpoint blockade in MMR-proficient tumors**

*Yu Fu*<sup>#</sup>, *Bin Yang*<sup>#</sup>, *Yaoyuan Cui*<sup>#</sup>, *Xingyuan Hu*, *Xi Li*, *Funian Lu*, *Tianyu Qin*, *Li Zhang*, *Zhe Hu*, *Ensong Guo*, *Junpeng Fan*, *Rourou Xiao*, *Wenting Li*, *Xu Qin*, *Dianxing Hu*, *Wenju Peng*, *Jingbo Liu*, *Beibei Wang*, *Gordon B. Mills*, *Gang Chen*, and *Chaoyang Sun*<sup>\*</sup>

## Supplementary Figures

Figure S1 BRD4 inhibition down-regulated MMR proteins and impaired MMR function in vitro

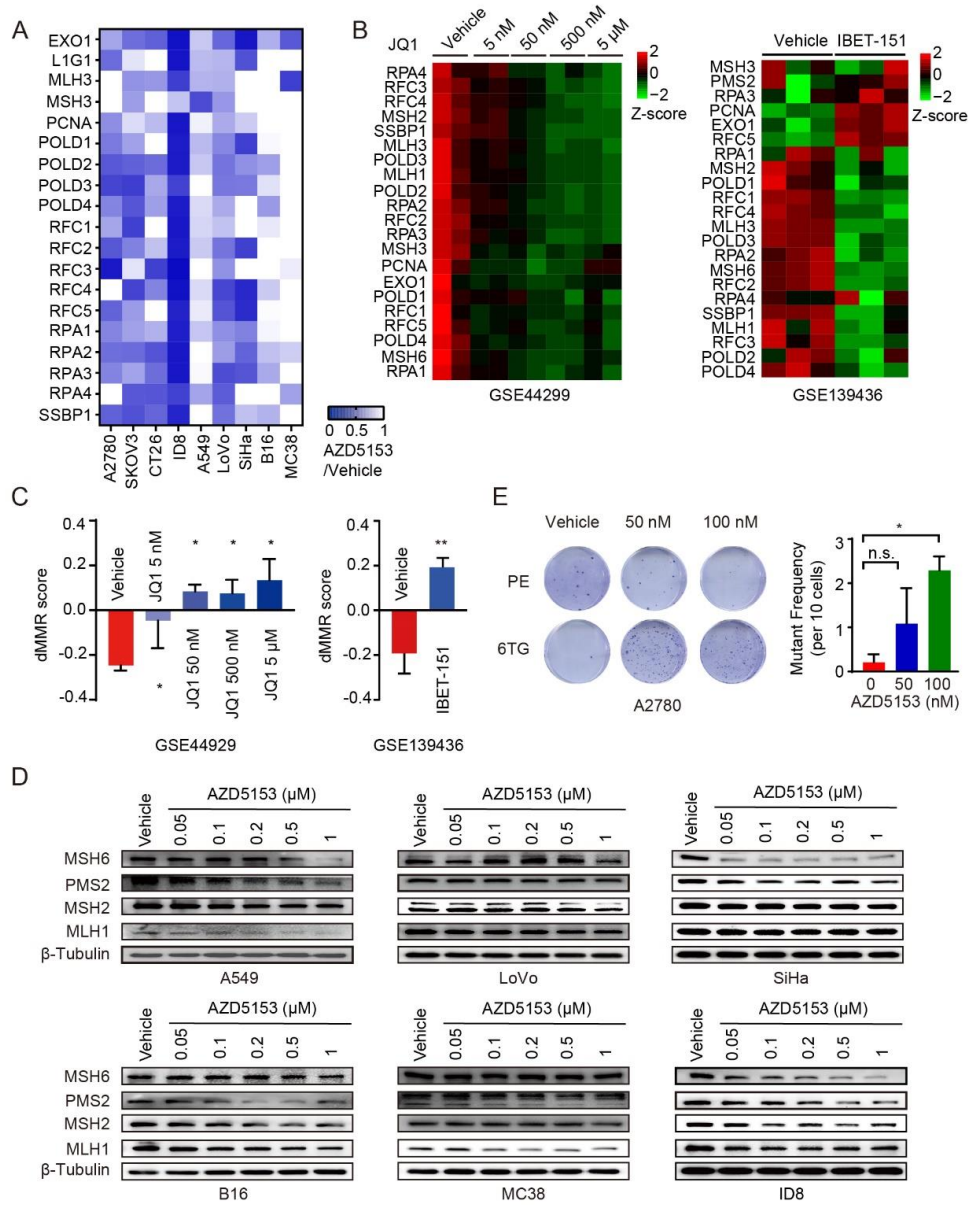

(A) Heatmap showed relative expression changes of 19 MMR system-related genes by RT-qPCR in A2780, SKOV3, CT26, ID8, A549, LoVo, SiHa, B16, and MC38 cell lines treated with 1  $\mu$ M AZD5153 for 48 hours.

(B) Heatmap shows z-score of the expression of 23 MMR system-related genes based on the GSE44299 (left) and GSE139436 (right) datasets.

(C) dMMR scores for BRD4i-treated cell lines in GSE44929 (left) and GSE139436 (right) datasets. Higher scores represent more defective MMR.

(D) Western blot analysis of MLH1, MSH2, MSH6, and PMS2 proteins in A549, LoVo, SiHa, B16, MC38, and ID8 cell lines treated with the indicated dose of AZD5153 for 72 hours.

(E) Representative pictures (left) and mutant frequency (right) of mutability assay in A2780 treated with vehicle or the indicated dose of AZD5153.

Figure S2 BRD4 transcriptionally regulates MMR genes

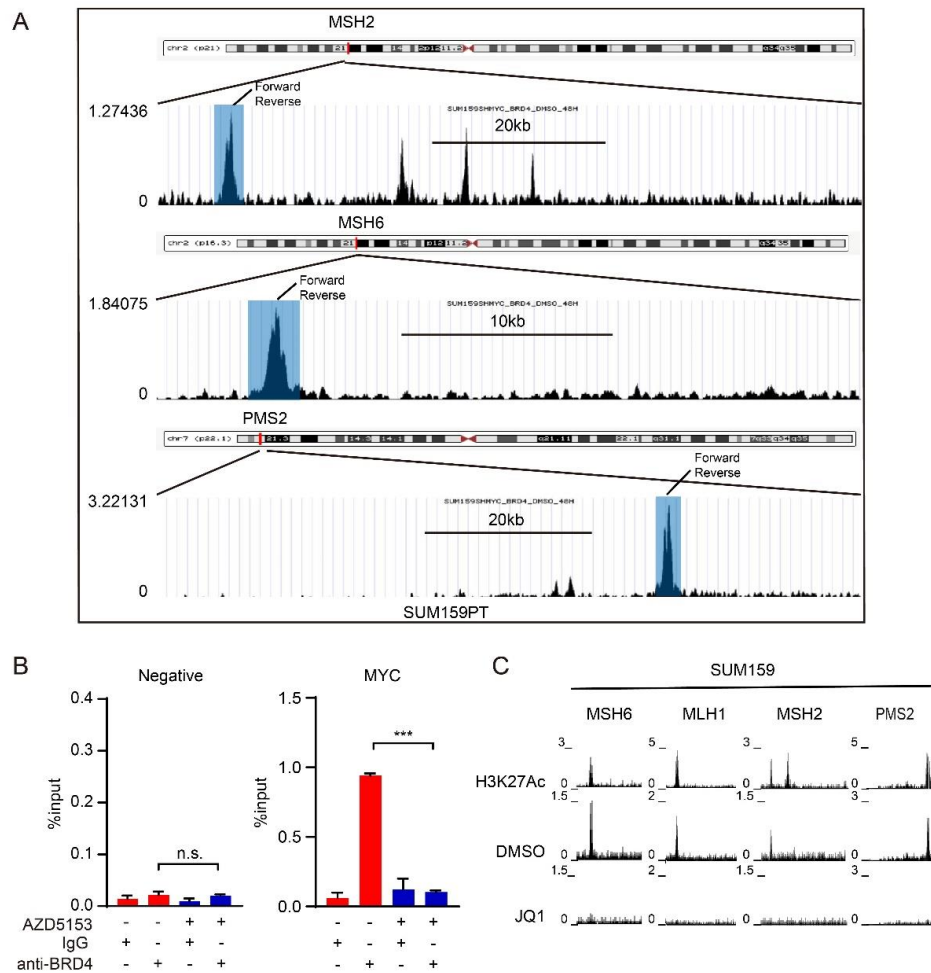

- (A) UCSC Genome Browser was used to show BRD4 ChIP-seq signal profiles in the MSH2, MSH6, and PMS2 gene loci. Primers for ChIP-qPCR validation are indicated.
- (B) ChIP-qPCR of BRD4 in SKOV3 treated with vehicle or 1  $\mu$ M AZD5135 for 48 hours. Data represent mean  $\pm$ SEM from three replicates, two-tailed t tests (\*,  $p < 0.05$ ; \*\*,  $p < 0.01$ ; \*\*\*,  $p < 0.001$ )
- (C) ChIP sequencing of anti-H3K27ac at the MLH1, MSH2, MSH6, and PMS2 loci in SUM149 cells treated with DMSO or 10  $\mu$ M JQ1 in GSE131102 dataset.

**Figure S3 Prolonged incubation with BRD4i in vitro results in acquisition of dMMR, a dMMR mutational signature that persists despite BRD4i resistance**

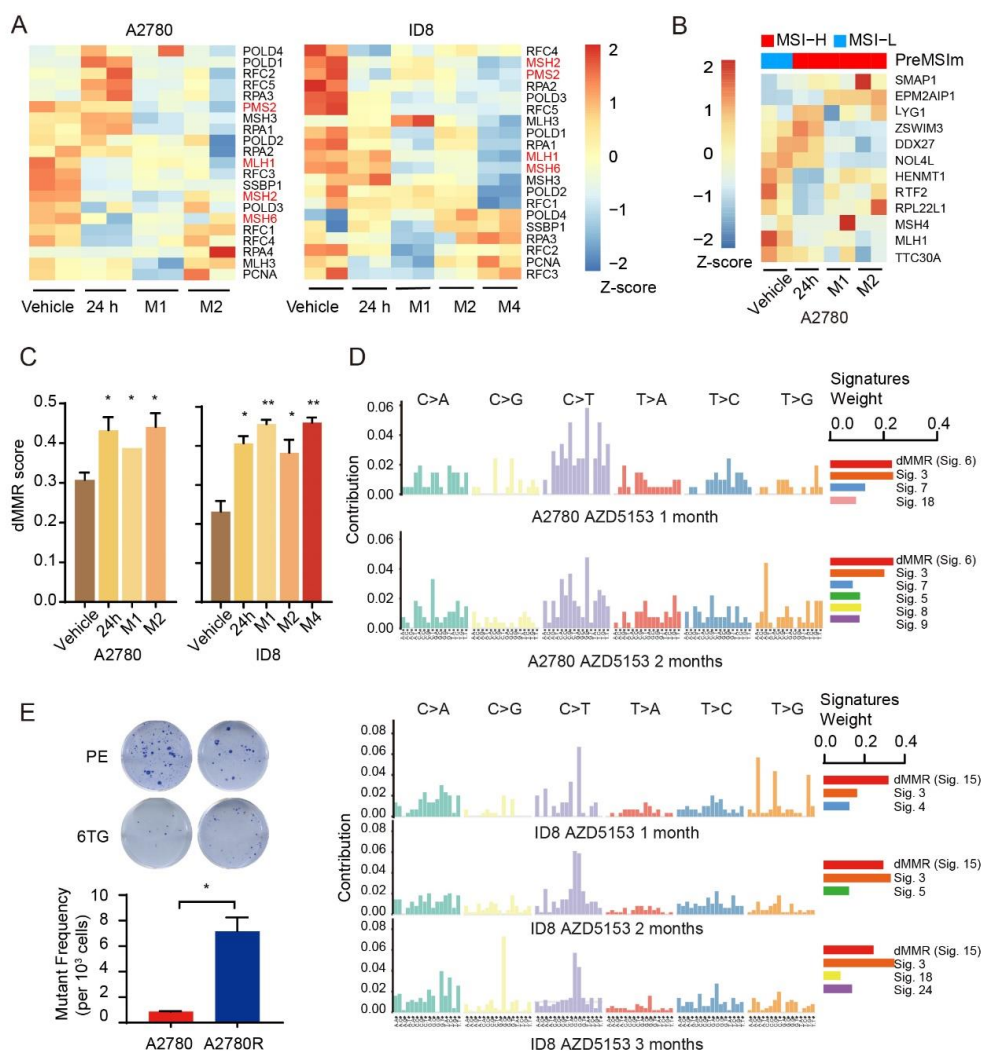

- (A) RNA-seq data from A2780 cells treated with vehicle or AZD5153 (24 hours, 1 month, and 2 months) (left) or ID8 cells treated with vehicle or AZD5153 (24 hours, 1 month, 2 months, and 4 months) (right) were analyzed for the expression of 23 MMR related genes. Heatmap shows z-score of relative expression of 23 MMR related genes in indicated treatment.
- (B) RNA-seq data from A2780 cells treated with vehicle or AZD5153 (24 hours, 1 month, and 2 months) were analyzed for PreMSIm signature to assess the MSI status. Heatmap shows z-score of relative expression of genes in indicated timepoint of AZD5153 treatment. The top bar indicates the MSI status defined by PreMSIm (blue indicates MSI-low (MSI-L), representing proficient MMR; red indicates MSI-high (MSI-H), representing dMMR).
- (C) RNA-seq data from A2780 cells treated with vehicle or AZD5153 (24 hours, 1 month, and 2 months) (left) and ID8 cells treated with vehicle or AZD5153 (24 hours, 1 month, 2 months, and 4 months)

- (right) were analyzed for dMMR scores. Data represent mean  $\pm$  SD, two-tailed t tests: \*,  $p < 0.05$ ; \*\*,  $p < 0.01$ ; \*\*\*,  $p < 0.001$ .
- (D) WES data from A2780 cells treated with vehicle or AZD5153 (1 month and 2 months) (upper) and ID8 cells treated with vehicle or AZD5153 (1 month, 2 months, and 4 months) (lower) were analyzed for the mutational signatures and weights of known mutational processes in the Cosmic Signatures for each sample. The proportion of dMMR mutation signatures represented the sum of weights for dMMR-related Cosmic Signatures at each timepoint.
- (E) Representative pictures (left) and mutant frequency (right) of mutability assay in parental A2780 cells and A2780R cells. Data are shown as mean  $\pm$  SEM from each of three independent replicates, two-tailed t tests: \*,  $p < 0.05$ ; \*\*,  $p < 0.01$ ; \*\*\*,  $p < 0.001$ .

**Figure S4 AZD5153-resistant tumors acquires sensitivity to  $\alpha$ PD-L1**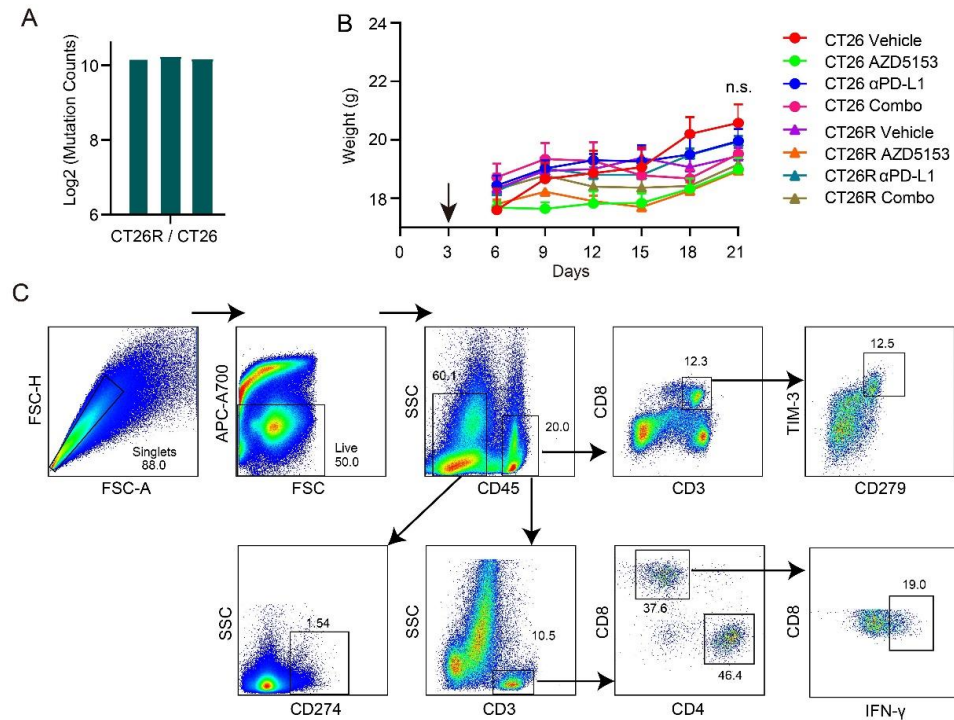

- (A) The log<sub>2</sub>-transformed tumor mutation counts for three replicated CT26R samples, taking CT26 cell line as reference genome and finally assessed by WES sequencing for somatic variants analysis.
- (B) Body weight curves after indicated treatment in CT26 and CT26R models. Data represent mean  $\pm$  SEM. p values were determined by Mann-Whitney test. n.s., not significant.
- (C) The gating strategy for effector CD8 T cells and exhausted T cells.

**Figure S5 Prolonged exposure to BRD4i in vivo results in acquisition of dMMR, and BRD4i resistance and acquired sensitivity to  $\alpha$ PD-L1 therapy**

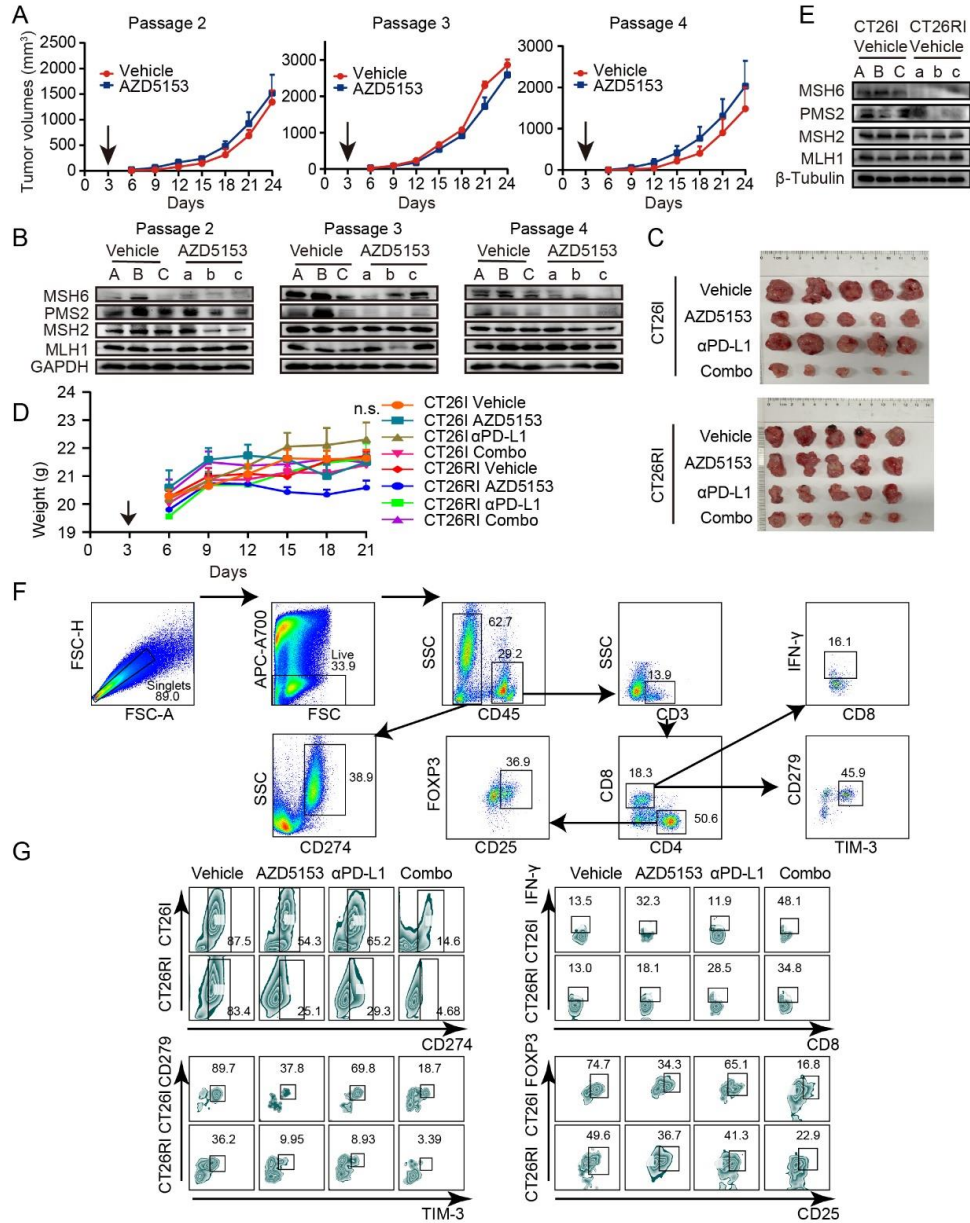

- (A) AZD5153-induced resistance in vivo model (CT26RI) mice and the control model (CT26I) (passage 2, 3, and 4) were treated with vehicle (0.5% hydroxypropylmethylcellulose and 0.2% Tween 80), or AZD5153 (1.25 mg/kg per day). Average tumor volumes  $\pm$  SEM for each cohort was displayed.
- (B) Tumor tissues of passage 2, 3, and 4 CT26RI and CT26I models were collected for western blotting of MLH1, MSH2, MSH6, and PMS2.
- (C) We transplanted the tumor tissues with same tumor sizes from the fourth generation of CT26I and CT26RI mice into 20 new BALB/c mice respectively. Tumors of CT26I and CT26RI were



- further randomized into various treatment groups after implantation: vehicle (0.5% hydroxypropylmethylcellulose and 0.2% Tween 80), AZD5153 (1.25 mg/kg per day, oral gavage),  $\alpha$ PD-L1 antibody (200 mg/mouse every 3 days for six times), or a combination of AZD5153 and  $\alpha$ PD-L1 antibody. Surgically removed the tumor tissues after treatment complete.
- (D) Body weight curves after indicated treatment in CT26I and CT26RI models. Data represent mean  $\pm$  SEM. p values were determined by Mann-Whitney test. n.s., not significant.
  - (E) Western blotting of MLH1, MSH2, MSH6, and PMS2 proteins expression in CT26I and CT26RI mice treated with vehicle.
  - (F) The gating strategy for effector CD8 T cells, exhausted T cells, Treg cells, and PD-L1<sup>+</sup> tumor cells.
  - (G) Representative flow cytometry plots of PD-L1<sup>+</sup> tumor cells (gated on CD45<sup>-</sup> cells, up left), effector CD8 T cells (CD8<sup>+</sup> IFN- $\gamma$ <sup>+</sup>, gated on CD8<sup>+</sup> cells, up right), exhausted CD8 T cells (TIM3<sup>+</sup> PD-1<sup>+</sup>, gated on CD8<sup>+</sup> cells, bottom left), and Treg cells (FOXP3<sup>+</sup> CD25<sup>+</sup>, gated on CD4<sup>+</sup> cells, bottom right) in CT26I and CT26RI tumors treated as indicated.

## Supplementary Tables

Table S1. The primer sequences for RT-qPCR.

| Gene          | Forward primer (5' - 3') | Reverse primer (5' - 3') |
|---------------|--------------------------|--------------------------|
| Human-EXO1    | TGAGGAAGTATAAAGGGCAGGT   | AGTTTTTCAGCACAAGCAATAGC  |
| Human-MLH1    | CTCTTCATCAACCATCGTCTGG   | GCAAATAGGCTGCATACACTGTT  |
| Human-LIG1    | GAAGGAGGCATCCAATAGCAG    | ACTCTCGGACACCACTCCATT    |
| Human-MLH3    | ACAAGCCAAATTGCGTTCTGG    | TTCAGCATCAATACTGTTGAGGG  |
| Human-MSH2    | AGGCATCCAAGGAGAATGATTG   | GGAATCCACATACCCAACCTCAA  |
| Human-MSH3    | GTGGACCCCGATATAAGGTGGG   | AAAGGGCAGTCAATTTCCGGG    |
| Human-MSH6    | CCAAGGCGAAGAACCTCAAC     | ACCAGGGGTAACCCTCCATC     |
| Human-PCNA    | CCTGCTGGGATATTAGCTCCA    | CAGCGGTAGGTGTGCGAAGC     |
| Human-PMS2    | CCTATTGATCGGAAGTCAGTCCA  | CTACTAACTCCTTTACCGCAGTG  |
| Human-POLD1   | ATCCAGAACTTCGACCTTCCG    | ACGGCATTGAGCGTGTAGG      |
| Human-POLD2   | CCATCAGCCAACAATGCCAC     | CTAGCCGGAAGGGTTGTGA      |
| Human-POLD3   | GAGTTCGTCACGGACCAAAAC    | GCCAGACACCAAGTAGGTAAC    |
| Human-POLD4   | ACCCAAGAACCTCAGGACAG     | AGTTGAGCCTCTGACACCTC     |
| Human-RFC1    | TGGAGAGGCAGTTGCATGAAG    | CCTTTCGAGCCTTTTTGGTCT    |
| Human-RFC2    | GTGAGCAGGCTAGAGGTCTTT    | TGAGTTCCAACATGGCATCTTTG  |
| Human-RFC3    | GTGGACAAGTATCGGCCCTG     | TGATGGTCCGTACACTAACAGAT  |
| Human-RFC4    | CCGCTGACCAAGGATCGAG      | AGGGAACGGGTTTGGCTTTC     |
| Human-RFC5    | GAAGCAGACGCCATGACTCAG    | GACCGAACCGAAACCTCGT      |
| Human-RPA1    | GGGGATACAAACATAAAGCCCA   | CGATAACGCGGCGGACTATT     |
| Human-RPA2    | GCACCTTCTCAAGCCGAAAAG    | CCCCACAATAGTGACCTGTGAAA  |
| Human-RPA3    | AGCTCAATTCATCGACAAGCC    | TCTTCATCAAGGGGTTCCATCA   |
| Human-RPA4    | GTGACCAACTGTGTGAGAGAG    | TACACGGTACAACGTCCTGAA    |
| Human-SSBP1   | TGAGTCCGAAACAACCTACCAGT  | CCTGATCGCCACATCTCATTAG   |
| Human-β-actin | CAGCCATGTACGTTGCTATCCAGG | AGGTCCAGACGCAGGATGGCATG  |
| Mouse-Exo1    | TGGCTGTGGATACCTACTGTT    | ATCGGCTTGACCCCATAAAGAC   |
| Mouse-Mlh1    | GTTTTACTCCATTCGGAAGCAGT  | TGTGAGCGGAAGGCTTTATAGAT  |
| Mouse-Lig1    | CCAGCTCATAGTCCCCTCTGA    | GTCTTGGCACCTCTAGCAGG     |
| Mouse-Mlh3    | AAAGATGCTCCTGAAGTGGGG    | TCTTCCACGACTACTGGGCTC    |
| Mouse-Msh2    | GTGCAGCCTAAGGAGACGC      | CTGGGTCTTGAACACCTCGC     |
| Mouse-Msh3    | CAGTGTGCGGGATGACAGG      | CCAAGGCGCAGATCACAGG      |
| Mouse-Msh6    | CACTCGGCGACACCAAGAA      | CTCCGTTGAGATCCTTTGCCT    |
| Mouse-Pcna    | TTTGAGGCACGCTGATCC       | GGAGACGTGAGACGAGTCCAT    |
| Mouse-Pms2    | CGCAGGTTGAACTTTTGGCT     | CCGTGGCAGGTAGATATAGTGA   |

|               |                         |                         |
|---------------|-------------------------|-------------------------|
| Mouse-Pold1   | TCGCAGTTTGAGGCGAACC     | CTGAGCCCACATAGTGGTCA    |
| Mouse-Pold2   | GCAGCGTATCAAAGTAAAGGC   | ACCTGAAACCTCCCGTCATCT   |
| Mouse-Pold3   | AAGATCGTGACTTACAAGTGGC  | ACACCAAGTAGGTAACATGCAG  |
| Mouse-Pold4   | ATCACTGACTCCTATCCTGTTGT | TACTGCCAGGCCAGGTCAA     |
| Mouse-Rfc1    | ATCCTGTACCTACGTCTCTG    | TGGAGGCTGCCTTTTTACATAC  |
| Mouse-Rfc2    | CTGCCGTGGGTTGAAAATACA   | CAGAGGATGCTGGTTGTCTTG   |
| Mouse-Rfc3    | CAGAGTGCAGCAATACCCTTT   | ACAATAGCATTGCGGTCTCC    |
| Mouse-Rfc4    | ATGCAGGCATTTCTGAAAGGC   | CCCAAGGAACTGGTTTGACTT   |
| Mouse-Rfc5    | CCAGGACATTCTGAGTACCATTC | GGGCCATAGAGAAGTAGGTGT   |
| Mouse-Rpa1    | ACATCCGTCCCATTTCTACAGG  | CTCCCTCGACCAGGGTGTT     |
| Mouse-Rpa2    | GAGTCCGAGCCAGCATATTG    | CCTGTGAAATCTCGACATCTCCA |
| Mouse-Rpa3    | ACCGTGCTCTGTGCATCTTAT   | GGAAGCCCTACAGGGAAAAACT  |
| Mouse-Rpa4    | TCAACGGCTATTGAGGGCAG    | ACTCATCTGGTTCCTCGGA     |
| Mouse-Ssbp1   | TTCAGTTACTTGGACGAGTAGGT | CGCCACATCTCATTGTTGCTA   |
| Mouse-β-actin | TGCTGTCCCTGTATGCCTCTG   | TGATGTCACGCACGATTTC     |

**Table S2. The primer sequences for ChIP-qPCR.**

| Gene     | Forward primer (5' - 3') | Reverse primer (5' - 3') |
|----------|--------------------------|--------------------------|
| MLH1     | CAAATAACGCTGGGTCCACT     | GCTTCTCAGGCTCCTCCTCT     |
| MSH2     | GCAACCTACCCTGCATACAC     | GCATCCTTAGTAGAGCTCCTTTCT |
| MSH6     | CCAGAGAGGCAGGGCTTT       | GAAGTCTGAGCTCCCCTTC      |
| PMS2     | TGCGTCCAAAAGTATGTGT      | AATGCATTGAAGCGAGACC      |
| Negative | CGTTTCCAGCGCATATCTTT     | TCACCACAGGGCTCACCTAT     |
| MYC      | AGGGATCGCGCTGAGTATAA     | TGCCTCTCGCTGGAATTACT     |

**Table S3. The numbers of TCGA cases in Figure 2H**

| Cancer Type | Total Number | BRD4_MUT,<br>MMR_WT | BRD4_WT,<br>MMR_MUT | BRD4_WT,<br>MMR_WT |
|-------------|--------------|---------------------|---------------------|--------------------|
| BLCA        | 409          | 11                  | 35                  | 363                |
| BRCA        | 1024         | 4                   | 27                  | 993                |
| CESC        | 289          | 7                   | 11                  | 271                |
| COAD        | 401          | 16                  | 43                  | 342                |
| ESCA        | 183          | 3                   | 9                   | 171                |
| GBM         | 397          | 5                   | 5                   | 387                |
| HNSC        | 508          | 7                   | 16                  | 485                |

|      |     |    |    |     |
|------|-----|----|----|-----|
| KIRP | 281 | 2  | 9  | 270 |
| LUAD | 516 | 4  | 31 | 481 |
| LUSC | 483 | 12 | 26 | 445 |
| SKCM | 456 | 20 | 44 | 392 |
| STAD | 435 | 11 | 32 | 392 |
| UCEC | 502 | 10 | 66 | 426 |
